# Supplementary material for: Ultrasound and Microwave-Assisted Synthesis of Hexagonally Ordered Ce-Promoted Mesoporous Silica as Ni Supports for Ethanol Steam Reforming
Source: MDPI journal article supplement (doi:10.3390/nano13060997), 2023-03-09
Supplement: s1 [file s1]

## Electronic Supplementary Information

# Ultrasound and microwave-assisted synthesis of hexagonally ordered Ce-promoted mesoporous silica as Ni supports for ethanol steam reforming

Jorge Tovar-Rodriguez<sup>1</sup>, Emiliano Fratini<sup>1,\*</sup>, Piero Baglioni<sup>1</sup>, Carlo Ferrari<sup>2</sup>, José Antonio de los Reyes-Heredia<sup>3</sup>, Yonatan Ramírez-Hernández<sup>4</sup> and Ignacio René Galindo-Esquivel<sup>4,\*</sup>

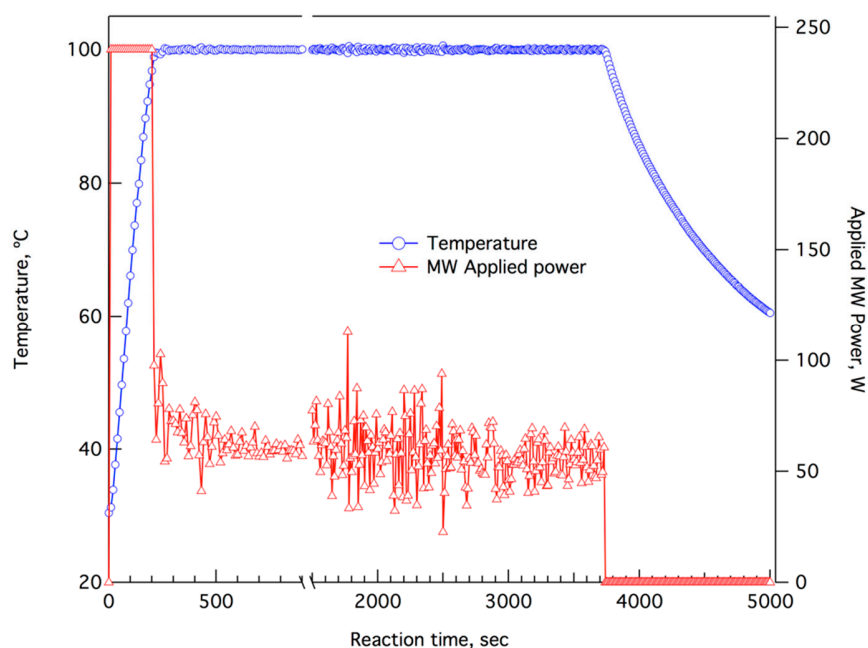

**Figure S1.** Temperature profile for the MW-assisted hydrothermal synthesis of 0.02Ce-mesoporous silica.

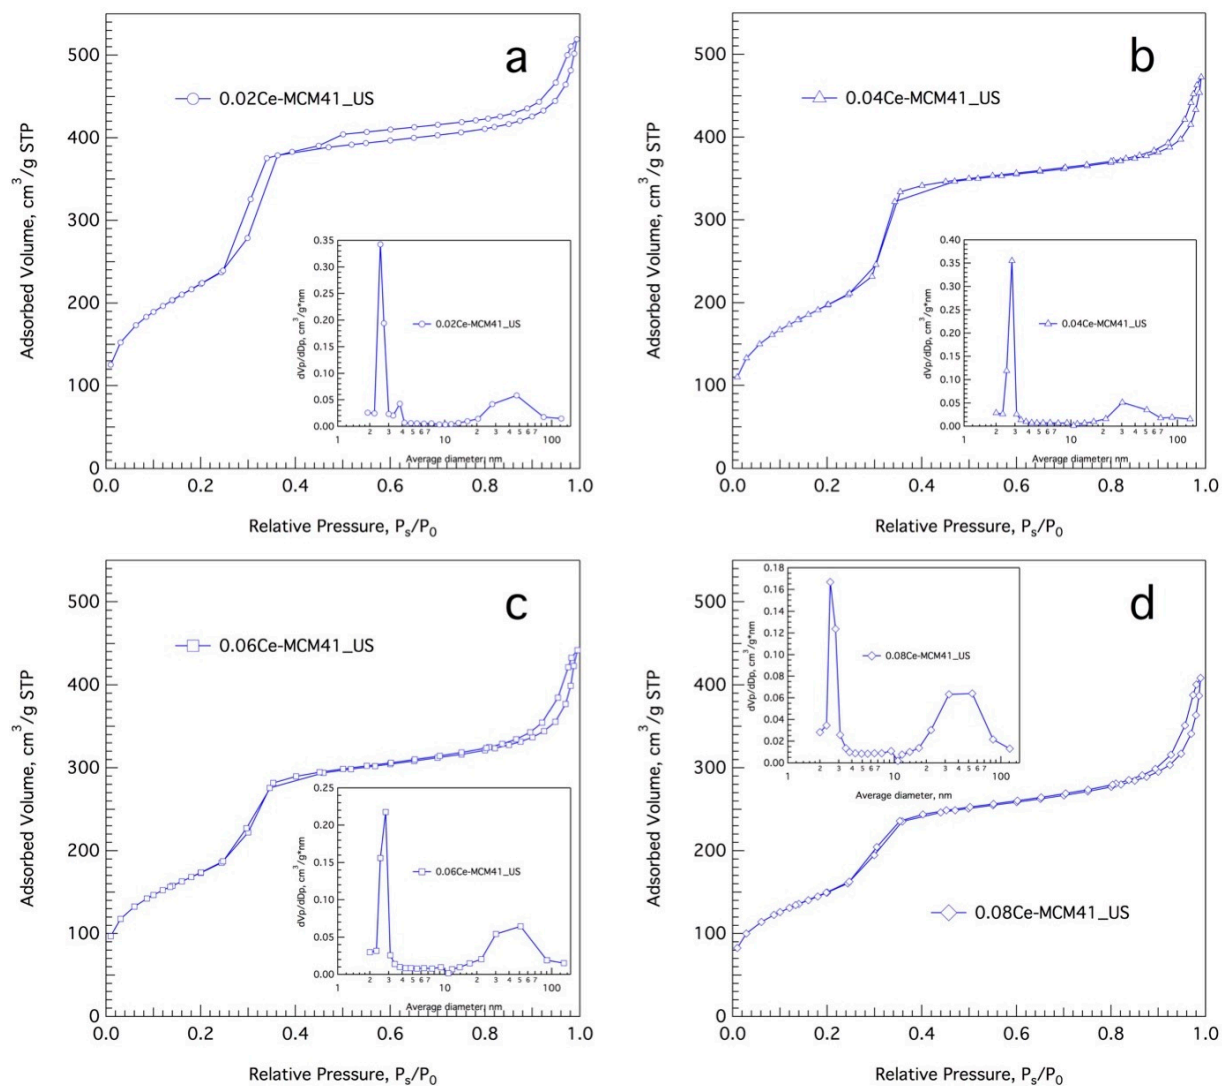

**Figure S2.** Nitrogen adsorption and desorption isotherms for a) 0.02Ce-MCM-41\_US, b) 0.04Ce-MCM-41\_US, c) 0.06Ce-MCM-41\_US and d) 0.08Ce-MCM-41\_US materials after calcination. Inset graphs: BJH pore size distribution for the same materials.

**Table S1.**  $Q^n$  distributions for the Silicon species in xCe-MCM-41\_US calcined materials.

| Sample           | $Q^4$ | $Q^3$ | $Q^2$ | $Q^3/Q^4$ | $(Q^2+Q^3)/Q^4$ |
|------------------|-------|-------|-------|-----------|-----------------|
| MCM-41           | 50.4  | 38.4  | 11.2  | 0.76      | 0.99            |
| 0.02Ce-MCM-41_US | 62.9  | 22.6  | 14.5  | 0.36      | 0.59            |
| 0.04Ce-MCM-41_US | 59.2  | 23.1  | 17.7  | 0.39      | 0.69            |
| 0.06Ce-MCM-41_US | 59.6  | 26.6  | 13.8  | 0.45      | 0.68            |
| 0.08Ce-MCM-41_US | 57.9  | 21.0  | 20.9  | 0.36      | 0.72            |

**Table S2.** Ethanol conversion ( $X_{EtOH}$ ) and product yield after 1 and 6h for the Ni/xCe-MCM-41 catalysts series in the ethanol steam reforming reaction (all reactions were performed at T = 773 K).

| Catalyst            | $X_{EtOH}$<br>at 1h | Product yield after 1 h |                 |      |                 | $X_{EtOH}$<br>at 6h | Product yield after 6 h |                 |      |                 |
|---------------------|---------------------|-------------------------|-----------------|------|-----------------|---------------------|-------------------------|-----------------|------|-----------------|
|                     |                     | H <sub>2</sub>          | CH <sub>4</sub> | CO   | CO <sub>2</sub> |                     | H <sub>2</sub>          | CH <sub>4</sub> | CO   | CO <sub>2</sub> |
| Ni/0.02Ce-MCM-41_US | 100                 | 3.02                    | 0.74            | 0.33 | 0.94            | 100                 | 3.48                    | 0.48            | 0.27 | 1.25            |
| Ni/0.04Ce-MCM-41_US | 100                 | 3.11                    | 0.58            | 0.35 | 1.08            | 100                 | 3.38                    | 0.55            | 0.33 | 1.12            |
| Ni/0.06Ce-MCM-41_US | 100                 | 3.13                    | 0.59            | 0.39 | 0.98            | 100                 | 3.49                    | 0.56            | 0.33 | 1.11            |
| Ni/0.08Ce-MCM-41_US | 100                 | 3.38                    | 0.51            | 0.30 | 1.10            | 100                 | 3.14                    | 0.47            | 0.34 | 1.19            |
